# Supplementary material for: Severity of oro-dental anomalies in Loeys-Dietz syndrome segregates by gene mutation
Source: PubMed Central journal article supplement — J Med Genet. 2020 Mar 8;57(10):699–707. doi: 10.1136/jmedgenet-2019-106678 (PMC7525783; doi:10.1136/jmedgenet-2019-106678), 2020-03-08
Supplement: jmedgenet-2019-106678supp001.pdf [file jmedgenet-2019-106678supp001.pdf]

Supplementary Table 1. Data for individual patients

| Patient | LDS Type | Age  | Sex | Grade | Delayed Eruption | Crowding | Occlusion | Orthodontic Treatment | Mandibular Projection | Palate Height | Uvula  | Palate Shape | Deep Bite | Cleft Palate | Hyper-sensitivity | Gingivitis | TMJ Abnormal |
|---------|----------|------|-----|-------|------------------|----------|-----------|-----------------------|-----------------------|---------------|--------|--------------|-----------|--------------|-------------------|------------|--------------|
| I       | 1        | 6.1  | M   | 1     | No               | Absent   | Class 1   | Yes                   | Retrognathic          | High          | Bifid  | Normal       | Present   | Absent       | Present           | Normal     | Absent       |
| IIA     | 1        | 37.1 | F   | 0     | No               | Mild     | Class 2   | No                    | Retrognathic          | High          | Bifid  | Narrow       | Absent    | Absent       | Present           | Gingivitis | Present      |
| IIB     | 1        | 6.8  | M   | 1     | No               | Absent   | Class 2   | No                    | Retrognathic          | High          | Bifid  | Narrow       | Absent    | Absent       | Present           | Normal     | Absent       |
| IIIA    | 1        | 17.1 | F   | 0     | No               | Absent   | Class 2   | No                    | Retrognathic          | High          | Normal | Normal       | Absent    | Absent       | Absent            | Gingivitis | Present      |
| IIIB    | 1        | 41.9 | F   | 0     | No               | Absent   | Class 1   | Yes                   | Retrognathic          | High          | Normal | Normal       | Absent    | Absent       | Absent            | Gingivitis | Absent       |
| IV      | 1        | 12.9 | M   | 0     | No               | Absent   | Class 1   | No                    | Normal                | High          | Normal | Normal       | Absent    | Absent       | Absent            | Gingivitis | Present      |
| V       | 1        | 11.9 | F   | 1     | No               | Absent   | Class 2   | Yes                   | Retrognathic          | High          | Normal | Narrow       | Present   | Absent       | Present           | Gingivitis | Absent       |
| VI      | 1        | 8.6  | F   | 1     | No               | Absent   | Class 2   | No                    | Retrognathic          | High          | Bifid  | Narrow       | Present   | Absent       | Absent            | Normal     | Absent       |
| VIIA    | 1        | 55   | M   | 1     | No               | Absent   | Class 2   | Yes                   | Retrognathic          | High          | Normal | Normal       | Absent    | Absent       | Present           | Normal     | Present      |
| VIIIB   | 1        | 16.3 | M   | 0     | No               | Absent   | Class 1   | Yes                   | Retrognathic          | High          | Normal | Normal       | Absent    | Absent       | Absent            | Gingivitis | Present      |
| VIII    | 1        | 3.7  | M   | 2     | No               | Absent   | Class 1   | Yes                   | Retrognathic          | High          | Bifid  | Normal       | Present   | Absent       | Present           | Normal     | Absent       |
| IX      | 1        | 14.2 | F   | 1     | No               | Absent   | Class 3   | No                    | Retrognathic          | High          | Normal | Narrow       | Present   | Absent       | Present           | Gingivitis | Present      |
| X       | 1        | 5.5  | M   | 0     | No               | Absent   | Class 1   | Yes                   | Retrognathic          | High          | Normal | Narrow       | Absent    | Absent       | Absent            | Normal     | Absent       |
| XI      | 1        | 6.7  | M   | 0     | No               | Absent   | Class 2   | Yes                   | Retrognathic          | High          | Normal | Narrow       | Present   | Present      | Absent            | Gingivitis | Absent       |
| XII     | 1        | 17   | M   | 0     | No               | Absent   | Class 2   | Yes                   | Retrognathic          | High          | Bifid  | Narrow       | Absent    | Absent       | Present           | Gingivitis | Absent       |
| XIIIA   | 2        | 44.3 | M   | 2     | No               | Absent   | Class 1   | No                    | Retrognathic          | High          | Normal | Narrow       | Absent    | Absent       | Present           | Gingivitis | Present      |
| XIIIB   | 2        | 11.1 | F   | 0     | Yes              | Absent   | Class 2   | No                    | Retrognathic          | Normal        | Bifid  | Narrow       | Present   | Absent       | Absent            | Normal     | Absent       |
| XIV     | 2        | 21.6 | F   | 4     | No               | Absent   | Class 2   | No                    | Retrognathic          | High          | Bifid  | Narrow       | Absent    | Absent       | Present           | Gingivitis | Present      |
| XV      | 2        | 7.1  | F   | 0     | No               | Mild     | Class 2   | No                    | Retrognathic          | High          | Normal | Narrow       | Absent    | Absent       | Absent            | Gingivitis | Present      |
| XVI     | 2        | 10.7 | M   | 3     | No               | Absent   | Class 2   | No                    | Retrognathic          | High          | Normal | Narrow       | Absent    | Present      | Present           | Gingivitis | Present      |
| XVII    | 2        | 17.3 | F   | 1     | No               | Mild     | Class 3   | No                    | Normal                | High          | Bifid  | Narrow       | Present   | Absent       | Absent            | Gingivitis | Absent       |
| XVIII   | 2        | 11.2 | M   | 4     | Yes              | Absent   | Class 2   | Yes                   | Retrognathic          | High          | Bifid  | Narrow       | Present   | Present      | Present           | Normal     | Absent       |
| XIX     | 2        | 13.3 | F   | 3     | Yes              | Absent   | Class 2   | No                    | Retrognathic          | High          | Bifid  | Narrow       | Absent    | Absent       | Present           | Gingivitis | Absent       |
| XX      | 2        | 16.1 | F   | 3     | No               | Absent   | Class 1   | No                    | Retrognathic          | High          | Bifid  | Narrow       | Present   | Absent       | Present           | Gingivitis | Absent       |
| XXI     | 2        | 3.2  | F   | 0     | No               | Absent   | Class 2   | No                    | Retrognathic          | Normal        | Normal | Normal       | Absent    | Present      | Absent            | Normal     | Absent       |
| XXII    | 2        | 12.6 | F   | 1     | No               | Absent   | Class 2   | Yes                   | Retrognathic          | High          | Bifid  | Narrow       | Present   | Absent       | Absent            | Gingivitis | Absent       |
| XXIII   | 2        | 57.4 | F   | 0     | No               | Absent   | Class 1   | Yes                   | Retrognathic          | High          | Normal | Narrow       | Absent    | Absent       | Present           | Gingivitis | Present      |
| XXIV    | 2        | 8.9  | M   | 1     | No               | Absent   | Class 1   | Yes                   | Retrognathic          | High          | Bifid  | Narrow       | Absent    | Absent       | Absent            | Normal     | Absent       |
| XXV     | 2        | 12.4 | F   | 2     | Yes              | Moderate | Class 2   | No                    | Retrognathic          | High          | Bifid  | Narrow       | Present   | Present      | Absent            | Normal     | Absent       |
| XXVIA   | 3        | 19.8 | M   | 1     | No               | Severe   | Class 1   | Yes                   | Retrognathic          | Normal        | Normal | Normal       | Absent    | Absent       | Present           | Gingivitis | Absent       |
| XXVIB   | 3        | 35.5 | F   | 1     | No               | Mild     | Class 2   | No                    | Retrognathic          | Normal        | Normal | Normal       | Absent    | Absent       | Present           | Normal     | Present      |
| XXVIC   | 3        | 3.8  | M   | 0     | No               | Absent   | Class 2   | No                    | Normal                | Normal        | Normal | Normal       | Absent    | Absent       | Absent            | Normal     | Absent       |
| XXVII   | 4        | 25.6 | F   | 1     | No               | Absent   | Class 2   | No                    | Retrognathic          | High          | Normal | Normal       | Absent    | Absent       | Present           | Normal     | Present      |
| XXVIIIA | 4        | 4.9  | F   | 0     | No               | Mild     | Class 1   | Yes                   | Retrognathic          | Normal        | Normal | Normal       | Present   | Absent       | Absent            | Absent     | Absent       |
| XXVIIIB | 4        | 39.8 | M   | 1     | No               | Absent   | Class 2   | No                    | Normal                | High          | Normal | Narrow       | Absent    | Absent       | Absent            | Absent     | Absent       |
| XXVIIIC | 4        | 2.4  | F   | 0     | No               | Absent   | Class 2   | Yes                   | Retrognathic          | High          | Normal | Normal       | Absent    | Absent       | Absent            | Absent     | Absent       |
| XXIXA   | 4        | 38.2 | M   | 1     | No               | Absent   | Class 1   | Yes                   | Normal                | High          | Normal | Normal       | Absent    | Absent       | Absent            | Normal     | Absent       |
| XXIXB   | 4        | 2.4  | M   | 0     | No               | Absent   | Class 1   | Yes                   | Retrognathic          | Normal        | Normal | Normal       | Absent    | Absent       | Absent            | Absent     | Absent       |
| XXIXC   | 4        | 4.4  | M   | 0     | No               | Absent   | Class 1   | No                    | Normal                | High          | Normal | Narrow       | Absent    | Absent       | Absent            | Absent     | Absent       |
| XXX     | 5        | 37.5 | M   | 0     | No               | Absent   | Class 1   | No                    | Normal                | High          | Normal | Narrow       | Present   | Absent       | Present           | Gingivitis | Present      |

Supplementary Table 2: Distribution by age group and gender

|                         | Age Group        |                     |                  | Total<br>n= 40 | Gender        |                 |
|-------------------------|------------------|---------------------|------------------|----------------|---------------|-----------------|
|                         | Child<br>n=17    | Adolescence<br>n=12 | Adult<br>n=11    |                | Males<br>n=20 | Females<br>n=20 |
| Enamel defects          | 7 (41.2%)        | 8 (66.6%)           | 7 (63.6%)        | 22 (55.0%)     | 11 (55.0%)    | 11 (55.0%)      |
| Delayed Eruption        | 2 (11.8%)        | 2 (16.6%)           | 0 (0.0%)         | 4 (10.0%)      | 1 (5.0%)      | 3 (15.0%)       |
| Crowding                | 2 (11.8)         | 2 (16.6%)           | 3 (27.2%)        | 7 (17.5%)      | 1 (5.0%)      | 6 (30.0%)       |
| Mandibular Retrognathia | 15 (88.2%)       | 9 (75.0%)           | 8 (72.7%)        | 32 (80%)       | 14 (70.0%)    | 18 (90.0%)      |
| High Palate             | 12 (70.6%)       | 11 (91.6%)          | 9 (81.8%)        | 32 (80%)       | 17 (85.0%)    | 15 (75.0%)      |
| Abnormal Uvula          | 7 (41.2%)        | 6 (50.0%)           | 1 (9.0%)         | 14 (35.0%)     | 6 (30.0%)     | 8 (40.0%)       |
| Narrow Palate           | 10 (58.8%)       | 8 (66.6%)           | 5 (45.5%)        | 23 (57.5%)     | 11 (55.0%)    | 12 (60.0%)      |
| Deep Bite               | 7 (41.2%)        | 5 (41.6%)           | 1 (9.0%)         | 13 (32.5%)     | 5 (25.0%)     | 8 (40.0%)       |
| Cleft Palate            | 4 (23.5%)        | 0 (0.0%)            | 0 (0.0%)         | 4 (10.0%)      | 3 (15.0%)     | 1 (5.0%)        |
| Hypersensitivity        | <b>5 (29.4%)</b> | <b>6 (50.0%)</b>    | <b>8 (72.7%)</b> | 19(47.5%)      | 10 (50.0%)    | 9 (45.0%)       |
| Gingivitis              | <b>3 (17.6%)</b> | <b>11 (91.6%)</b>   | <b>6 (54.5%)</b> | 20 (50%)       | 8 (40.0%)     | 12 (60.0%)      |
| TMJ Abnormality         | <b>2 (11.8%)</b> | <b>5 (41.6%)</b>    | <b>7 (63.6%)</b> | 14 (35.0%)     | 6 (30.0%)     | 8 (40.0%)       |

Frequencies showing major difference between groups are in bold

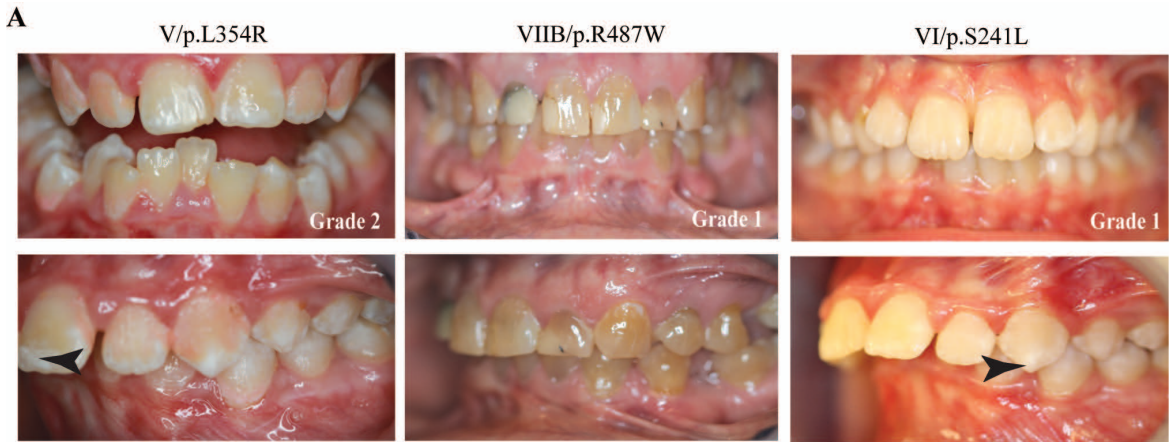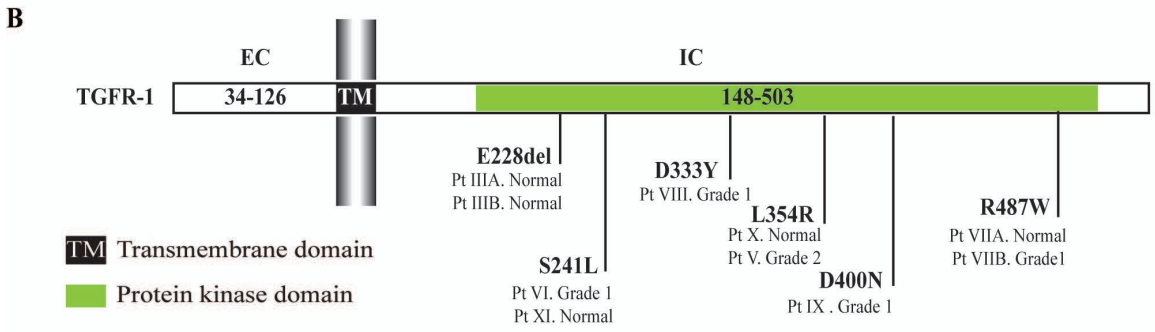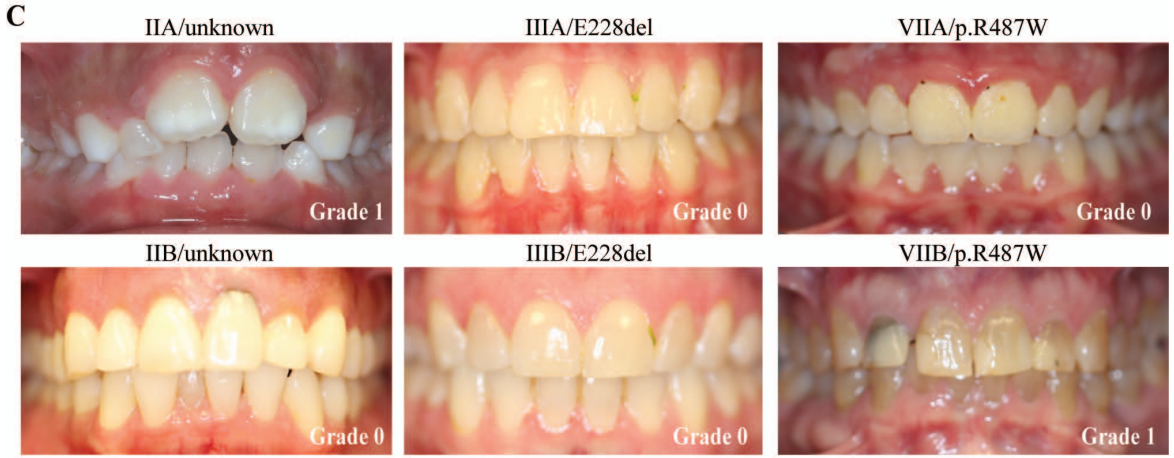

**Supplementary Figure 1**

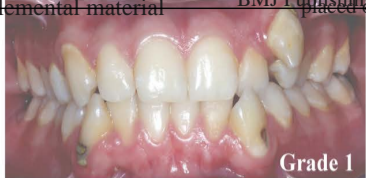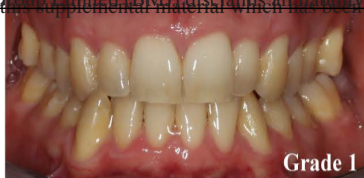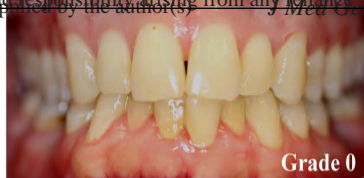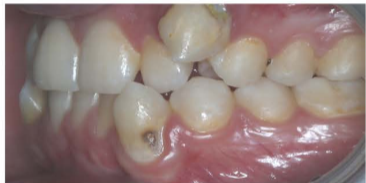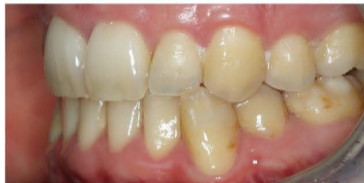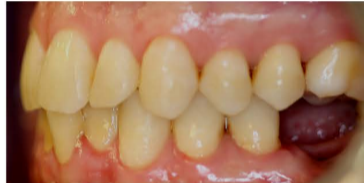

**Supplementary Figure 2**
